# Supplementary material
Source: PubMed Central journal article supplement (PMC6684349)
Supplement: NIHMS1007215-supplement-supp_materials.pdf [file NIHMS1007215-supplement-supp_materials.pdf]

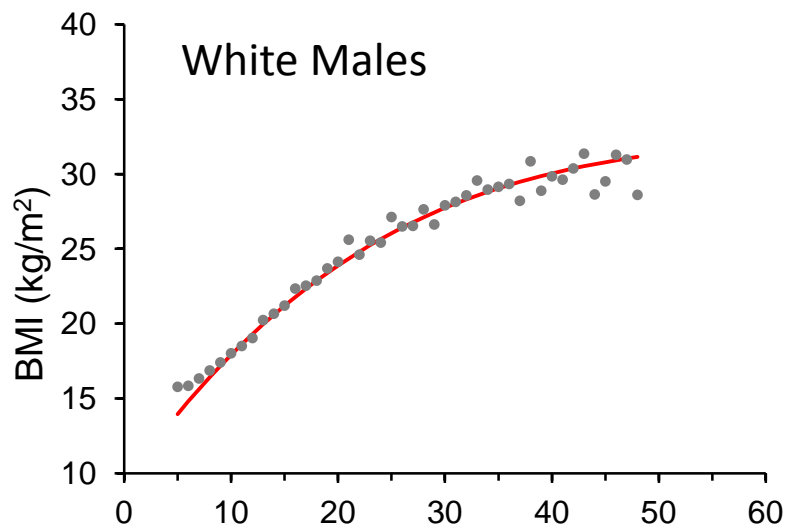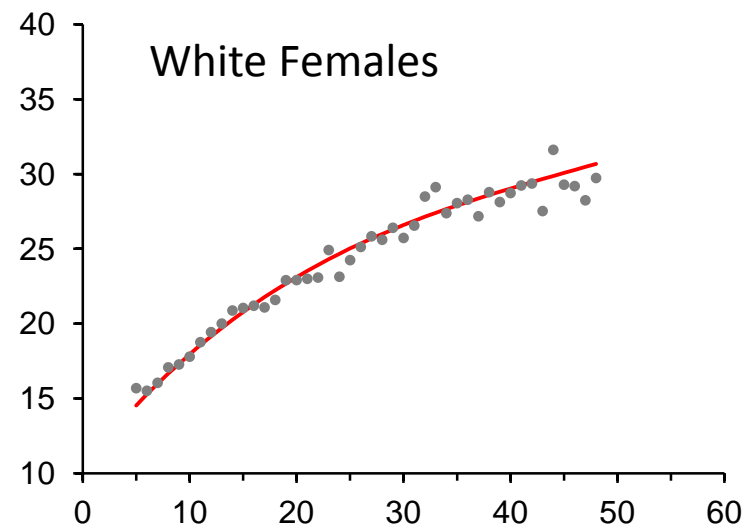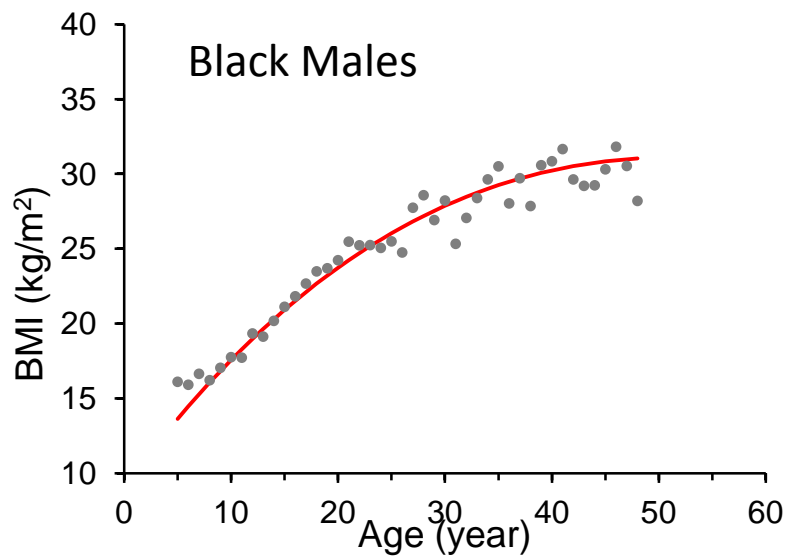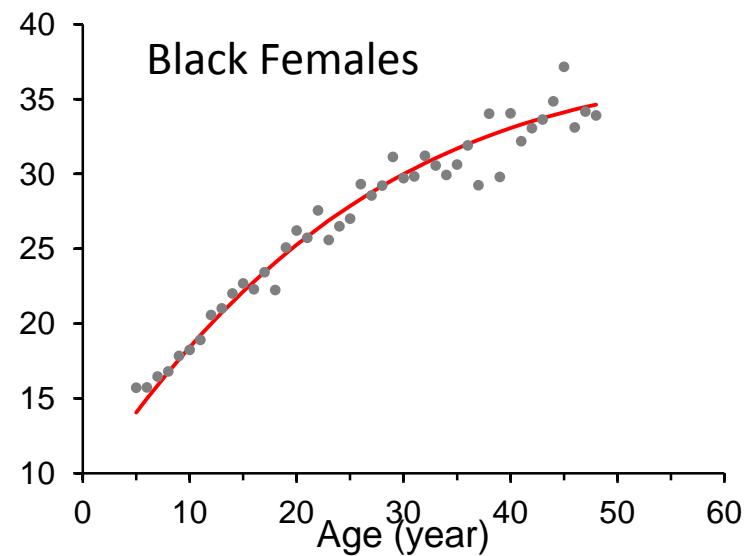

**Supplementary Figure 1.** Model-estimated growth curves and observed values of BMI by race and sex

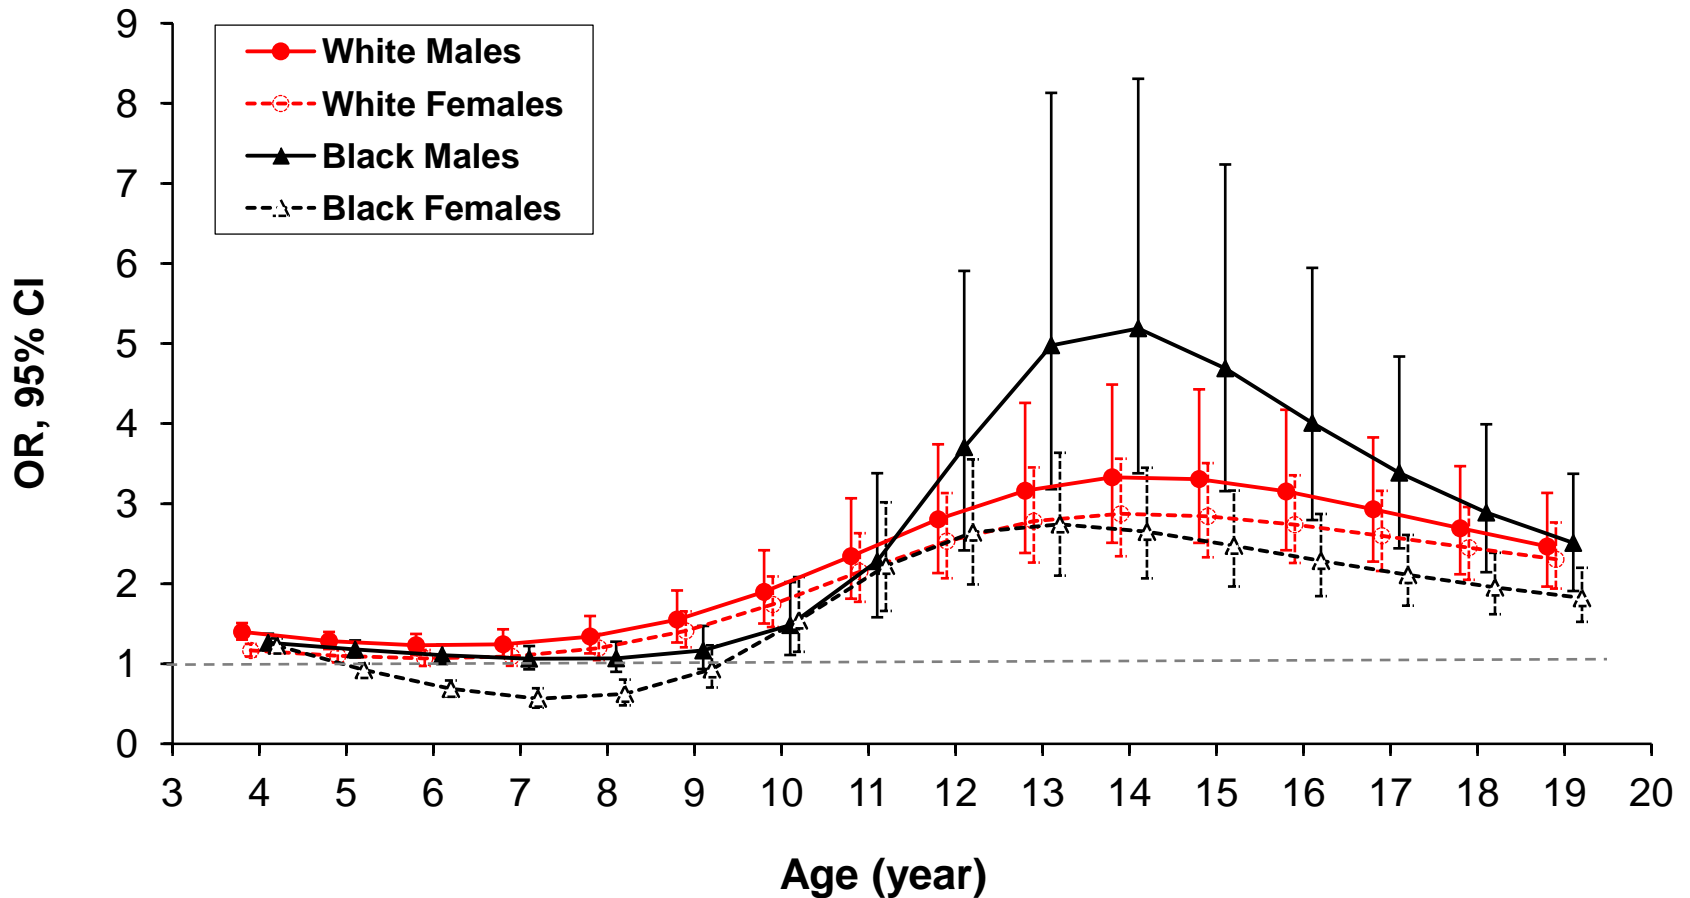

**Supplementary Figure 2.** Odds ratio (OR) and 95% confidence interval (CI) of level-adjusted linear slopes of BMI for adult obesity by childhood age, race and sex, adjusting for adult age, smoking and alcohol drinking

**Supplementary Table 1.** Combined fixed and random effects parameters of BMI in means (SD) by race and sex

| Curve parameter                                     | Whites (n=1772)  |                 | Blacks (n=960)  |                 | P for Race Difference |         |
|-----------------------------------------------------|------------------|-----------------|-----------------|-----------------|-----------------------|---------|
|                                                     | Males (n=803)    | Females (n=969) | Males (n=423)   | Females (n=537) | Males                 | Females |
| $\beta_0+b_0$ (kg/m <sup>2</sup> )                  | 23.9 (4.4)**     | 23.2 (5.0)      | 23.8 (4.8)**    | 25.3 (6.0)      | 0.582                 | <0.001  |
| $\beta_1+b_1$ (kg/m <sup>2</sup> /yr)               | 0.479 (0.200)**  | 0.419 (0.285)   | 0.508 (0.249)** | 0.569 (0.351)   | 0.027                 | <0.001  |
| $\beta_2+b_2$ (kg/m <sup>2</sup> /yr <sup>2</sup> ) | -0.105 (0.090)** | -0.084 (0.090)  | -0.101 (0.093)  | -0.105 (0.113)  | 0.474                 | <0.001  |
| $\beta_3+b_3$ (kg/m <sup>2</sup> /yr <sup>3</sup> ) | 0.002 (0.007)    | 0.002(0.008)    | 0.0009 (0.011)  | 0.0015 (0.010)  | 0.058                 | 0.183   |

All curve parameters were significant ( $p<0.001$ ) except 0.0009 ( $p=0.353$ ) in Black males and 0.0015 ( $p=0.054$ ) in Black females.

Gender difference within racial groups: \*  $p<0.05$ ; \*\*  $p<0.01$

**Supplementary Table 2.** Model-estimated mean (SD) BMI levels (kg/m<sup>2</sup>) during childhood by race and sex

| Age (years) | Whites (n=1,772) |                 | Blacks (n=960) |                 | P for Race Difference |         |
|-------------|------------------|-----------------|----------------|-----------------|-----------------------|---------|
|             | Males (n=803)    | Females (n=969) | Males (n=423)  | Females (n=537) | Males                 | Females |
| 4           | 13.09 (1.02)**   | 13.79 (1.51)    | 12.78 (1.87)** | 13.11 (0.88)    | <0.001                | <0.001  |
| 5           | 13.96 (1.21)**   | 14.54 (1.64)    | 13.64 (1.91)** | 14.06 (1.07)    | <0.001                | <0.001  |
| 6           | 14.81 (1.51)**   | 15.28 (1.84)    | 14.47 (2.08)** | 14.99 (1.45)    | 0.001                 | 0.002   |
| 7           | 15.63 (1.84)**   | 15.98 (2.08)    | 15.28 (2.33)** | 15.89 (1.87)    | 0.004                 | 0.359   |
| 8           | 16.42 (2.16)*    | 16.67 (2.34)    | 16.06 (2.60)** | 16.76 (2.28)    | 0.010                 | 0.470   |
| 9           | 17.18 (2.46)     | 17.32 (2.59)    | 16.82 (2.87)** | 17.60 (2.68)    | 0.023                 | 0.050   |
| 10          | 17.92 (2.74)     | 17.96 (2.84)    | 17.56 (3.13)** | 18.42 (3.06)    | 0.041                 | 0.003   |
| 11          | 18.62 (3.00)     | 18.57 (3.08)    | 18.28 (3.37)** | 19.21 (3.41)    | 0.066                 | <0.001  |
| 12          | 19.31 (3.23)     | 19.15 (3.31)    | 18.97 (3.59)** | 19.98 (3.74)    | 0.097                 | <0.001  |
| 13          | 19.96 (3.44)     | 19.72 (3.53)    | 19.64 (3.79)** | 20.72 (4.06)    | 0.135                 | <0.001  |
| 14          | 20.59 (3.62)     | 20.26 (3.75)    | 20.29 (3.97)** | 21.44 (4.36)    | 0.179                 | <0.001  |
| 15          | 21.20 (3.79)*    | 20.79 (3.96)    | 20.92 (4.14)** | 22.13 (4.65)    | 0.229                 | <0.001  |
| 16          | 21.78 (3.95)*    | 21.29 (4.17)    | 21.52 (4.29)** | 22.80 (4.93)    | 0.287                 | <0.001  |
| 17          | 22.34 (4.08)**   | 21.77 (4.37)    | 22.11 (4.44)** | 23.45 (5.20)    | 0.350                 | <0.001  |
| 18          | 22.88 (4.21)**   | 22.24 (4.57)    | 22.67 (4.57)** | 24.07 (5.46)    | 0.420                 | <0.001  |
| 19          | 23.39 (4.32)**   | 22.68 (4.77)    | 23.21 (4.71)** | 24.68 (5.72)    | 0.495                 | <0.001  |

Sex difference within racial groups: \* p<0.05; \*\* p<0.01

**Supplementary Table 3.** Model-estimated means (SD) linear slopes of BMI (kg/m<sup>2</sup>/year) during childhood by race and sex

| Age (year) | Whites (n=1,772) |                 | Blacks (n=960) |                 | P for Race Difference |         |
|------------|------------------|-----------------|----------------|-----------------|-----------------------|---------|
|            | Males (n=803)    | Females (n=969) | Males (n=423)  | Females (n=537) | Males                 | Females |
| 4          | 0.89 (0.52)**    | 0.77 (0.45)     | 0.87 (0.59)*   | 0.97 (0.60)     | 0.494                 | <0.001  |
| 5          | 0.86 (0.47)**    | 0.75 (0.41)     | 0.85 (0.53)**  | 0.94 (0.55)     | 0.570                 | <0.001  |
| 6          | 0.83 (0.43)**    | 0.72 (0.38)     | 0.82 (0.47)**  | 0.91 (0.51)     | 0.663                 | <0.001  |
| 7          | 0.80 (0.40)**    | 0.69 (0.35)     | 0.80 (0.42)**  | 0.88 (0.47)     | 0.777                 | <0.001  |
| 8          | 0.78 (0.36)**    | 0.67 (0.33)     | 0.77 (0.37)**  | 0.86 (0.43)     | 0.916                 | <0.001  |
| 9          | 0.75 (0.33)**    | 0.64 (0.31)     | 0.75 (0.33)**  | 0.83 (0.41)     | 0.922                 | <0.001  |
| 10         | 0.72 (0.30)**    | 0.62 (0.30)     | 0.73 (0.30)**  | 0.80 (0.38)     | 0.744                 | <0.001  |
| 11         | 0.69 (0.28)**    | 0.60 (0.29)     | 0.70 (0.27)**  | 0.78 (0.37)     | 0.562                 | <0.001  |
| 12         | 0.67 (0.26)**    | 0.58 (0.28)     | 0.68 (0.25)**  | 0.75 (0.36)     | 0.396                 | <0.001  |
| 13         | 0.64 (0.24)**    | 0.55 (0.28)     | 0.66 (0.23)**  | 0.73 (0.35)     | 0.261                 | <0.001  |
| 14         | 0.62 (0.22)**    | 0.53 (0.28)     | 0.64 (0.22)**  | 0.71 (0.34)     | 0.165                 | <0.001  |
| 15         | 0.59 (0.21)**    | 0.51 (0.28)     | 0.62 (0.22)**  | 0.68 (0.34)     | 0.104                 | <0.001  |
| 16         | 0.57 (0.21)**    | 0.49 (0.28)     | 0.59 (0.22)**  | 0.66 (0.34)     | 0.068                 | <0.001  |
| 17         | 0.55 (0.20)**    | 0.47 (0.28)     | 0.57 (0.23)**  | 0.64 (0.34)     | 0.048                 | <0.001  |
| 18         | 0.52 (0.20)**    | 0.46 (0.28)     | 0.55 (0.23)**  | 0.61 (0.35)     | 0.037                 | <0.001  |
| 19         | 0.50 (0.20)**    | 0.44 (0.28)     | 0.53 (0.24)**  | 0.59 (0.35)     | 0.030                 | <0.001  |

Sex difference within racial groups: \* p<0.05; \*\* p<0.01

Linear slopes were all significantly greater than 0 (p<0.001).
